# Supplementary material
Source: PubMed Central journal article supplement (PMC3391322)
Supplement: NIHMS382088-supplement-Supp_Fig_S1-S4___Table_S1-S2.pdf [file NIHMS382088-supplement-Supp_Fig_S1-S4___Table_S1-S2.pdf]

# Supporting Information

## Identification of the DotL Coupling Protein Subcomplex of the *Legionella* Dot/Icm Type IV Secretion System

Carr D. Vincent<sup>1</sup>, Jonathan R. Friedman<sup>2</sup>, Kwang Cheol Jeong<sup>3</sup>,  
Molly C. Sutherland<sup>4</sup> and Joseph P. Vogel<sup>4,\*</sup>

1 Max Planck Institute of Molecular Cell Biology and Genetics, Dresden, Germany.

2 Department of Molecular, Cellular, and Developmental Biology,  
University of Colorado, Boulder, CO, USA.

3 Department of Animal Sciences & Emerging Pathogens Institute,  
University of Florida, Gainesville, FL, USA.

4 Department of Molecular Microbiology,  
Washington University School of Medicine,  
St. Louis, MO, USA.

\*To whom correspondence should be addressed.

Department of Molecular Microbiology  
Washington University School of Medicine  
Box 8230  
660 S. Euclid Ave  
St. Louis, MO 63110  
Phone: (314)-747-1029  
Email: jvogel@borcim.wustl.edu

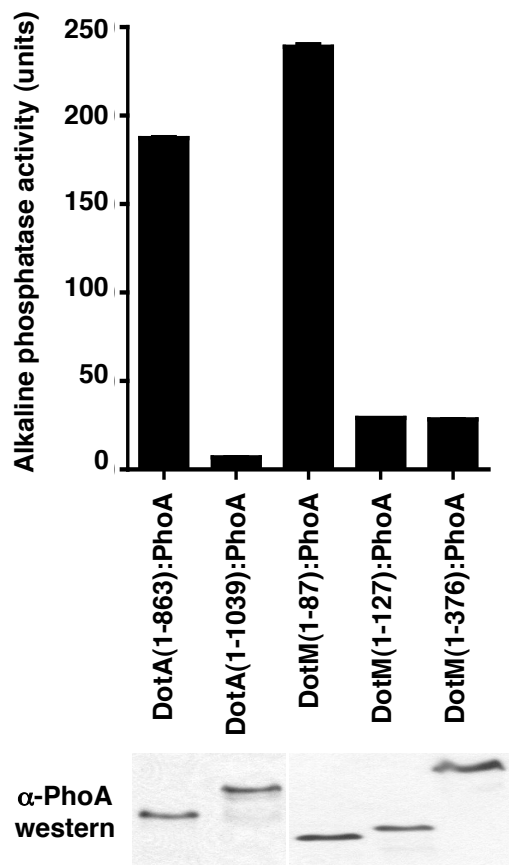

**Figure S1.** Membrane Topology of DotL and DotM.

Topology of DotM was experimentally determined using fusions to the reporter alkaline phosphatase (PhoA). PhoA is active when present in the periplasm, but is inactive when it localizes to the cytoplasm. Three DotM-PhoA fusions were constructed based on the predicted transmembrane domains of DotM using the Kyte-Doolittle hydrophilicity prediction program. A PhoA fusion after aa 87 of DotM was positive whereas fusions after aa 127 and aa 376 (the end of the protein) were negative. Equivalent production of the PhoA fusion proteins were confirmed by western blotting using an alkaline phosphatase antibody (Chemicon International). Fusions to the inner membrane protein DotA were used as controls. Controls included fusion of the first 863 aa of DotA as a PhoA-positive and fusion of the first 1039 aa as a PhoA-negative as previously described (Roy & Isberg, 1997). Results shown are representative of three independent experiments.

|   | X:T18       | T25:X      |
|---|-------------|------------|
| 1 | Zip         | Zip        |
| 2 | Vector      | Vector     |
| 3 | DotM(all)   | Vector     |
| 4 | DotM(1-220) | Vector     |
| 5 | DotM(1-127) | Vector     |
| 6 | Vector      | DotL(3-73) |
| 7 | DotM(all)   | DotL(3-73) |
| 8 | DotM(1-220) | DotL(3-73) |
| 9 | DotM(1-127) | DotL(3-73) |

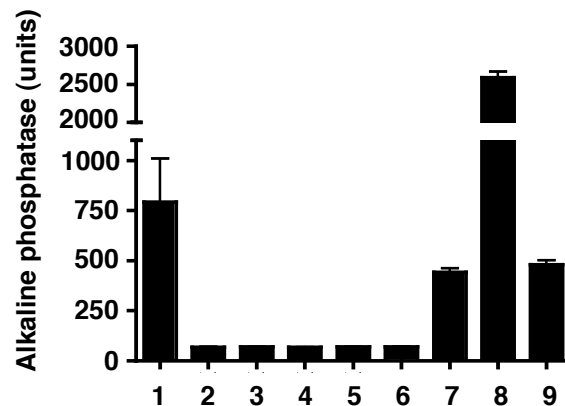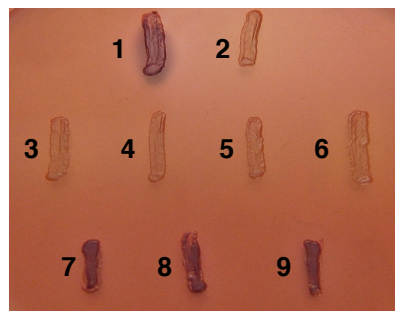

**Figure S2.** Two-Hybrid Analysis of the DotL-DotM Interaction.

The Ladant bacterial two-hybrid system is based on reconstitution of adenylate cyclase activity when the T18 and T25 domains of CyaA are brought into proximity via fusions to two proteins that interact. A positive signal produces cAMP, which can be quantified by increased  $\beta$ -galactosidase activity (upper right) and the fermentation of maltose on a MacConkey agar plate (red color in photo shown on lower right). The strains assayed are shown in the table on the left. The positive control (strain 1) consists of two leucine zipper domains fused to the T18 and T25 domains of CyaA. The negative control (strain 2) consists of the empty T18 and T25 fusion vectors. Experimental strains consisted of fusions to the first 73 amino acids of DotL and fusions of the first 127, 220, and 326 amino acids of DotM. The positive signal detected with DotL and DotM fusions was specific as each fusion assayed with the corresponding empty vector was negative. Results shown are representative of at least three independent experiments.

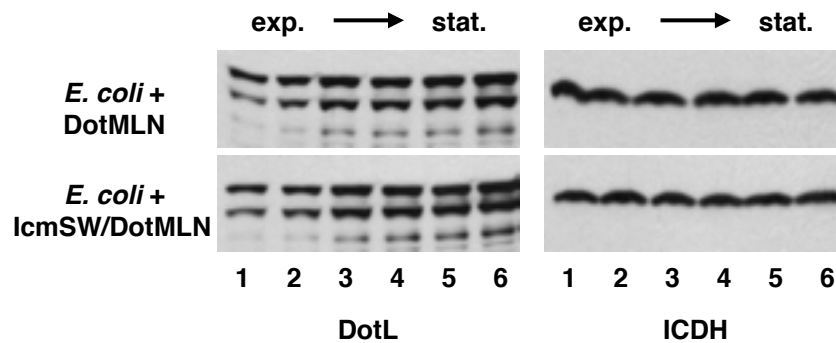

**Figure S3.** Stability of DotL in the Presence and Absence of IcmS and IcmW in *E. coli*. *E. coli* KY1429 strains were grown in broth with 0.1 mM IPTG and cells were collected at various stages of growth. Whole-cell extracts were analyzed by Western blotting using antibodies specific to the proteins listed beneath each panel. In each panel, lanes contain extracts made from cultures at the following OD<sub>600</sub>: lane 1, OD<sub>600</sub> ~0.6, lane 2, ~1.0, lane 3, ~1.3, lane 4, ~1.5, lane 5, ~1.6, and lane 6, ~1.7 (“exp” stands for exponential phase and “stat” represents stationary phase). Strains used were: KY1429 plus pJB4632 (*dotM dotL dotN*) and KY1429 plus pJB4636 (*icmS icmW dotM dotL dotN*). Western blots for ICDH served as a loading control. Results shown are representative of three independent experiments.

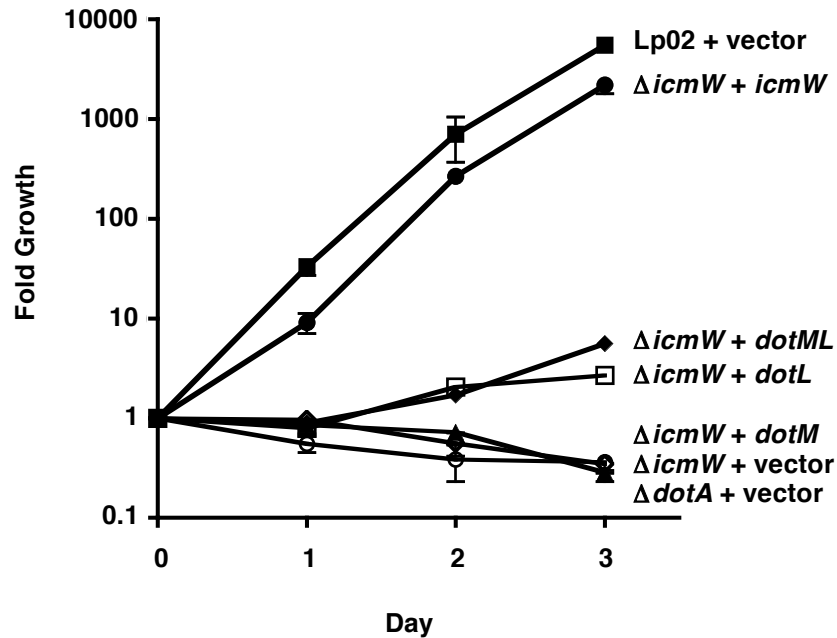

**Figure S4.** Partial Complementation of the  $\Delta icmW$  Mutation by Overexpression of DotL. Strains used were: wild-type plus vector (JV1139, filled squares),  $\Delta icmW$  plus  $icmW$  (JV3649, filled circles),  $\Delta icmW$  plus  $dotM + dotL$  (JV5571, filled diamonds),  $\Delta icmW$  plus  $dotL$  (JV5570, open squares),  $\Delta icmW$  plus  $dotM$  (JV5880, open diamonds),  $\Delta icmW$  plus vector (JV3658, open circles), and  $\Delta dotA$  plus vector (JV3029, filled triangles). Fold growth was calculated by dividing the number of colony forming units (CFU) recovered each day by the number of CFU recovered immediately after infection (day 0). Each time point represents the mean and standard deviation of colony forming units (CFU) recovered from triplicate wells. Growth curves are representative of three independent experiments.

**Table S1.** Bacterial strains, plasmids, and primers employed in this study

| Strain, plasmid or primer | Relevant properties                                                                                                               | Reference or source             |
|---------------------------|-----------------------------------------------------------------------------------------------------------------------------------|---------------------------------|
| <i>L. pneumophila</i>     |                                                                                                                                   |                                 |
| Lp02                      | Philadelphia-1 <i>thyA</i> , <i>hsdR</i> , <i>rpsL</i>                                                                            | (Berger & Isberg, 1993)         |
| JV1139                    | Lp02 + pJB908                                                                                                                     | (Bardill <i>et al.</i> , 2005)  |
| JV1962                    | Lp02 $\Delta icmS$                                                                                                                | (Vincent & Vogel, 2006)         |
| JV2064                    | Lp02 $\Delta dotA$                                                                                                                | (Vincent & Vogel, 2006)         |
| JV2422                    | Lp02 $\Delta dotA \Delta dotL::Cm^R$                                                                                              | (Buscher <i>et al.</i> , 2005)  |
| JV3029                    | JV2064 + pJB908                                                                                                                   | This study                      |
| JV3598                    | Lp02 $\Delta icmW$                                                                                                                | (Vincent & Vogel, 2006)         |
| JV3649                    | JV3598 + pJB2875                                                                                                                  | This study                      |
| JV3658                    | JV3598 + pJB908                                                                                                                   | This study                      |
| JV3719                    | Lp02 $\Delta dotA \Delta dotN$                                                                                                    | (Vincent <i>et al.</i> , 2006)  |
| JV4044                    | Lp02 $\Delta dot/icm$ complete                                                                                                    | (Vincent <i>et al.</i> , 2006)  |
| JV4191                    | JV4044 + pJB908                                                                                                                   | This study                      |
| JV4192                    | JV4044 + pJB3250                                                                                                                  | This study                      |
| JV4193                    | JV4044 + pJB3248                                                                                                                  | This study                      |
| JV4194                    | JV4044 + pJB1014                                                                                                                  | This study                      |
| JV5156                    | JV1962 + pJB908                                                                                                                   | This study                      |
| JV5157                    | JV1962 + pJB4271                                                                                                                  | This study                      |
| JV5361                    | Lp02 $\Delta dotA \Delta dotM$                                                                                                    | This study                      |
| JV5565                    | JV1962 + pJB1014                                                                                                                  | This study                      |
| JV5566                    | JV1962 + pJB3250                                                                                                                  | This study                      |
| JV5570                    | JV3598 + pJB1014                                                                                                                  | This study                      |
| JV5571                    | JV3598 + pJB3250                                                                                                                  | This study                      |
| JV5775                    | Lp02 $\Delta ldsB$                                                                                                                | This study                      |
| JV5809                    | JV1962 + pJB3248                                                                                                                  | This study                      |
| JV5880                    | JV3598 + pJB3248                                                                                                                  | This study                      |
| JV5972                    | Lp02 $\Delta dotN \Delta ldsB$                                                                                                    | This study                      |
| JV5976                    | Lp02 $\Delta dotL \Delta ldsB$                                                                                                    | This study                      |
| JV6019                    | Lp02 $\Delta dotM \Delta ldsB$                                                                                                    | This study                      |
| JV6315                    | Lp02 $\Delta clpA::CmR$                                                                                                           | This study                      |
| JV6339                    | Lp02 $\Delta icmS \Delta clpA::Cm^R$                                                                                              | This study                      |
| JV6294                    | JV6339 + pJB4897                                                                                                                  | This study                      |
| JV6296                    | JV6339 + pJB908                                                                                                                   | This study                      |
| JV6503                    | JV6315 + pJB908                                                                                                                   | This study                      |
| <i>E. coli</i>            |                                                                                                                                   |                                 |
| BTH101                    | <i>cya-99</i> , <i>araD139</i> , <i>galE15</i> , <i>galK16</i><br><i>rpsL1</i> (StrR), <i>hsdR2</i> , <i>mcrA1</i> , <i>mcrB1</i> | (Karimova <i>et al.</i> , 1998) |

|        |                                                                                                 |                             |
|--------|-------------------------------------------------------------------------------------------------|-----------------------------|
| KY1429 | <i>araD139 argF-lac169 flhD5301 fruA25 relA1 rpsL150 (strR) zhh-50::Tn10 rpoH606 (ts) deoC1</i> | (Tobe <i>et al.</i> , 1984) |
| JB3188 | KY1429 + pJB908                                                                                 | This study                  |
| JB3189 | KY1429 + pJB1014                                                                                | This study                  |
| JB3190 | KY1429 + pJB3248                                                                                | This study                  |
| JB3191 | KY1429 + pJB3250                                                                                | This study                  |
| JB4728 | KY1429 + pJB4610                                                                                | This study                  |
| JB4729 | KY1429 + pJB4632                                                                                | This study                  |
| JB4730 | KY1429 + pJB4636                                                                                | This study                  |

### Plasmids

|                      |                                                               |                                 |
|----------------------|---------------------------------------------------------------|---------------------------------|
| pBluescript II KS(+) | ColE1 cloning vector                                          | Stratagene                      |
| pJB908               | RSF1010 cloning vector                                        | (Sexton <i>et al.</i> , 2004)   |
| pJB1014              | pJB908 + <i>dotL</i>                                          | (Buscher <i>et al.</i> , 2005)  |
| pJB1806              | pJB908 CmR, without <i>tdAI</i>                               | (Bardill <i>et al.</i> , 2005)  |
| pJB2875              | pJB908 + <i>icmW</i>                                          | This study                      |
| pJB3248              | pJB908 + <i>dotM</i>                                          | This study                      |
| pJB3250              | pJB908 + <i>dotM dotL</i>                                     | This study                      |
| pJB3270              | pJB1806 + PhoA fusion vector                                  | This study                      |
| pJB3322              | Ladant T25:X fusion (pUC MCS)                                 | This study                      |
| pJB3656              | Ladant X:T18 fusion (pUC MCS)                                 | This study                      |
| pJB3671              | DotM(1-127):T18                                               | This study                      |
| pJB3672              | DotM(1-376):T18                                               | This study                      |
| pJB3765              | pJB3270 + DotM(1-127):PhoA                                    | This study                      |
| pJB3769              | pJB3270 + DotM(1-376):PhoA                                    | This study                      |
| pJB3771              | pJB3270 + DotM(1-87):PhoA                                     | This study                      |
| pJB4150              | pJB3270 + DotA(1-1039):PhoA                                   | This study                      |
| pJB4271              | pJB908 + <i>icmS</i>                                          | This study                      |
| pJB4299              | Bluescript II KS(+) with pUC MCS                              | This study                      |
| pJB4331              | pJB3270 + DotA(1-863):PhoA                                    | This study                      |
| pJB4570              | $\Delta$ <i>ldsB</i> suicide plasmid                          | This study                      |
| pJB4610              | pJB908 + <i>icmS icmW dotM dotL</i>                           | This study                      |
| pJB4632              | pJB908 + <i>dotM dotL dotN</i>                                | This study                      |
| pJB4636              | pJB908 + <i>icmS icmW dotM dotL dotN</i>                      | This study                      |
| pJB4680              | $\Delta$ <i>clpA</i> suicide vector                           | This study                      |
| pJB4712              | T25:DotL(3-73)                                                | This study                      |
| pJB4722              | DotM(1-220):T18                                               | This study                      |
| pJB4833              | $\Delta$ <i>clpA</i> ::Cm <sup>R</sup> marked suicide plasmid | This study                      |
| pJB4897              | <i>clpA</i> complementing clone                               | This study                      |
| pKRP10               | Cm <sup>R</sup> encoding gene                                 | (Reece & Phillips, 1995)        |
| pSR47S               | R6K suicide vector (Kan <sup>R</sup> , <i>sacB</i> )          | (Merriam <i>et al.</i> , 1997)  |
| pT18                 | bacterial 2-hybrid vector                                     | (Karimova <i>et al.</i> , 1998) |
| pT18-zip             | bacterial 2-hybrid positive control                           | (Karimova <i>et al.</i> , 1998) |
| pT25                 | bacterial 2-hybrid vector                                     | (Karimova <i>et al.</i> , 1998) |
| pT25-zip             | bacterial 2-hybrid positive control                           | (Karimova <i>et al.</i> , 1998) |

Primers

JVP274 GCATTCTTGATGAGTACGG  
JVP618 GCTCCAAAACCTGGGATACC  
JVP981 CCCGTCGACCCCTGTTCTGGAAAACCGGGC  
JVP1058 CCCGGATCCAGGAGAAATTACTATGCCTGATTTAAGCCATGAAGC  
JVP1059 CCCGTCGACGGTAATACTTTCATTATTCATCCC  
JVP1154 CCCGGTACCCGCAAAAATAGCTCTGAGCAG  
JVP1155 CCCGCATGCCTATTTTCATGGCTCTAATTCCTCCATTTGACG  
JVP1177 CCCTTCGAGCTATTTTCAGCCCCAGAGCGGCTTTCATGG  
JVP1225 CTTGGATCCCCGGGCTCGAGCTGCAGGCATGCGGCCGCGGTAC  
JVP1226 ACGTGAACCTAGGGGGCCCCGAGCTCGACGTCCGTACGCCGGCGC  
JVP1427 CCCGGATCCCGCAAACCTTTCATATCATAGG  
JVP1431 CCCGGATCCTGGCTCTAATTCCTCCATTTGACG  
JVP1432 CCCGGTACCAGGAGAAATTAGAGATGGCACAACAACAGCAGC  
JVP1462 CCCGGATCCACGCATTACAGTCACCATTTGATCC  
JVP1429 CCCGGATCCTGCGTAAGCCTGAGGAGAGCAACG  
JVP1547 CGCGAGCTCAGGAGAAATTA ACTATGAATAAATTAGCTATTACGGTCTC  
JVP1550 CGCTCTAGAACC ACTATCAGAACCGCCAG  
JVP1570 GCGGTGACGCGCCGAGCGAGGCCACGGG  
JVP1571 GCAGCGGCCGCTAGCGTTC ACTGCGCCAGCG  
JVP1575 CGCGGATCCCGGGGTATTGATTCTCGTCATG  
JVP1579 GATAGGAATTCGAGCTCGGTACCCGGGGATCCTCTAGAGTCGACGCGGCCGAGCT  
JVP1580 GCGGCCGCGTCGACTCTAGAGGATCCCCGGGTACCGAGCTCGAATTCCTATCGTAC  
JVP1585 CGCTCTAGACTTCGCATCATTTCGAACTGGTGC  
JVP1693 GCGGTGACCTTCCAGCATTGAGTACTGG  
JVP1694 CGCGGATCCGTATCTGAAAGGTATAACTTGC  
JVP1695 CGCGGATCCGCCCGTTATTTGGATTTATAGGC  
JVP1696 CGCGCGGCCGCCCAACGTTCCAGAAAAGG  
JVP1704 CCCTGCAGTTACTTTCGGGTATAGCTATAAAGAAAAAATATGCC  
JVP1737 CGCGGTACCGAGGAGAAATTA ACTATGGAGCGAGATATTAGCAAG  
JVP1738 CGCGGTACCTTATTCATCCCCTTCGAGTGCTCG  
JVP1741 CGCGCATGCTTATGTTAATTCCTCTGCAGCC  
JVP1791 CCCGTCGACGAGTGAATCATATCTAATCACTATGC  
JVP1792 CCCGGATCCTGCTTCCTTGAAAGCTAGATTCAAGG  
JVP1793 CCCGGATCCCTGCATTTTGACAGTCATGATCATAGAG  
JVP1794 CCCGCGGCCGCGTACCTTGAATCTTGTTTAGCAGG  
JVP1877 CCCGAGCTCGGGTTGGTAAGGAGCAATGAC  
JVP1878 CCCGGTACCCGGGTTTCGTTTAACAAACACC

\*Restriction enzyme sites are underlined



**Table S2.** Proteases and regulators checked for DotL degradation in the absence of IcmS

| <u>Lpg#</u> | <u>Protease class</u> | <u>Predicted localization</u> | <u><i>E. coli</i> homolog</u> | <u>% Identity</u> |
|-------------|-----------------------|-------------------------------|-------------------------------|-------------------|
| 0019        | Zinc metalloprotease  | Periplasm                     | n.h.*                         | --                |
| 0499        | Serine                | Periplasm                     | Prc/Tsp                       | 28                |
| 0903        | Serine                | Periplasm                     | DegP (Do-like)                | 35                |
| 0825        | Zinc metalloprotease  | Periplasm                     | YebA                          | 44                |
| 1655        | Zinc metalloprotease  | Periplasm                     | n.h.                          | --                |
| 2019        | Serine                | Periplasm                     | n.h.                          | --                |
| 2671        | Zinc metalloprotease  | Periplasm                     | PqqL                          | 25                |
| 2672        | Zinc metalloprotease  | Periplasm                     | PqqL                          | 24                |
| 0180        | Zinc metallo.         | Inner memb.                   | HtpX                          | 30                |
| 0505        | Zinc metallo.         | Inner memb.                   | RseP                          | 43                |
| 0855        | Serine                | Inner memb.                   | Signal peptide peptidase      | 46                |
| 1176        | Zinc metallo.         | Inner memb.                   | YfgC                          | 32                |
| 1525        | Unknown               | Inner memb.                   | CAAX N-terminal protease      | --                |
| 1749        | Serine                | Inner memb.                   | Signal peptide peptidase      | 27                |
| 2007        | Aspartyl              | Inner memb.                   | n.h.                          | --                |
| 2333        | Zinc metallo.         | Inner memb.                   | RseP                          | 30                |
| 2586        | Cysteine              | Inner memb.                   | n.h.                          | --                |
| 2622        | Cysteine              | Inner memb.                   | n.h.                          | --                |
| 2978        | Zinc metallo.         | Inner memb.                   | n.h.                          | --                |
| 0392        | Zinc metallo.         | Cytoplasm                     | n.h.                          | --                |
| 0640        | Threonine             | Cytoplasm                     | HslV                          | 82                |
| 1859        | Serine                | Cytoplasm                     | La (Lon)                      | 68                |
| 1977        | Cysteine              | Cytoplasm                     | ThiJ/PfpI                     | 29                |
| 2977        | Zinc metallo.         | Cytoplasm                     | n.h.                          | --                |
| 0818        | Regulator             | Cytoplasm                     | ClpA                          | 66                |
| 1438        | Regulator             | Cytoplasm                     | CpxR                          | 48                |
| 1577        | Regulator             | Cytoplasm                     | RpoE                          | 36                |

\*n.h. stands for no significant homology

## Supplementary Materials and Methods

**Construction of plasmids.** The following clones were constructed as described below. Primers (named JVP) are listed in Table S1. PCR inserts were sequenced for all plasmids to confirm that no errors were introduced during amplification.

**pJB2875** (*icmW* complementing clone) was constructed by amplifying *icmW* using JVP1058/JVP1059, digesting the PCR product with BamHI/SalI and cloning it into BamHI/SalI-digested pJB908.

**pJB3248** (*dotM* complementing clone) was constructed by amplifying *dotM* using JVP1154/JVP1155, digesting the PCR product with KpnI/SphI and cloning it into KpnI/SphI-digested pJB908.

**pJB3250** (*dotM/dotL* complementing clone) was constructed by amplifying *dotM* and the amino-terminus of *dotL* using JVP1154/JVP618, digesting the PCR product with KpnI/XhoI and cloning it into KpnI/XhoI-digested pJB1014.

**pJB3270** (X:PhoA fusion vector) was constructed by amplifying *phoA* using JVP981/JVP1177, digesting the PCR product with SalI/XhoI and cloning it into SalI-digested pJB1806.

**pJB3322** (Ladant T25:X fusion vector) was constructed by annealing primers JVP1225/JVP1226 together and ligating them into PstI/KpnI-digested Ladant vector pKT25.

**pJB3656** (Ladant X:T18 vector with pUC MCS) was constructed by amplifying a portion of *cyaA* from pT18 using JVP1570/JVP1571, digesting the PCR product with SalI/NotI and cloning it into SalI/NotI-digested pJB4299.

**pJB3671** (DotM(1-127):T18 fusion) was constructed by subcloning a KpnI/BamHI fragment containing a portion of *dotM* from pJB3765 into KpnI/BamHI-digested pJB3656 (X:T18 Ladant fusion vector).

**pJB3672** (DotM(all):T18 fusion) was constructed by subcloning a KpnI/BamHI fragment containing *dotM* from pJB3656 into KpnI/BamHI-digested pJB3656 (X:T18 Ladant fusion vector).

**pJB3765** (DotM(1-127):PhoA) was constructed by amplifying a portion of *dotM* using JVP1427/JVP1432, digesting the PCR product with KpnI/BamHI and cloning it into KpnI/BamHI-digested pJB3270 (X:PhoA fusion vector).

**pJB3769** (DotM(all):PhoA) was constructed by amplifying a portion of *dotM* using JVP1431/JVP1432, digesting the PCR product with KpnI/BamHI and cloning it into KpnI/BamHI-digested pJB3270 (X:PhoA fusion vector).

**pJB3771** (DotM(1-87):PhoA) was constructed by amplifying a portion of *dotM* using JVP1432/JVP1462, digesting the PCR product with KpnI/BamHI and cloning it into KpnI/BamHI-digested pJB3270 (X:PhoA fusion vector).

**pJB4150** (DotA(1-1039):PhoA) was constructed by amplifying a portion of *dotM* using JVP1547/JVP1550, digesting the PCR product with SacI/XbaI and cloning it into SacI/XbaI-digested pJB3270 (X:PhoA fusion vector).

**pJB4271** (*icmS* complementing clone) was constructed by subcloning a EcoRI/BamHI fragment containing *icmS* from pJB1745 into EcoRI/BamHI-digested pJB1550 (modified pJB908 vector lacking the 5' EcoRI site).

**pJB4299** (Bluescript II KS(+)) with pUC MCS was constructed by annealing primers JVP1579/JVP1580 together and ligating them into KpnI/SacI-digested Bluescript II KS(+).

**pJB4331** (DotA(1-863):PhoA) was constructed by amplifying a portion of *dotM* using JVP1547/JVP1585, digesting the PCR product with SacI/XbaI and cloning it into SacI/XbaI-digested pJB3270 (X:PhoA fusion vector).

**pJB4570** ( $\Delta$ *ldsB* suicide vector) was constructed by amplifying 500 bp upstream and 500 bp downstream of the *ldsB* ORF using primers JVP1693/JVP1694 and JVP1695/JVP1696. The PCR products were digested with Sall/BamHI and BamHI/NotI, respectively, and cloned into Sall/NotI-digested pSR47S.

**pJB4610** (*icmS/icmW/dotM/dotL* complementing clone) was constructed by amplifying *icmS/icmW* operon using JVP1737/JVP1738, digesting the product with KpnI and cloning it into KpnI-digested pJB3250 (*dotM/dotL* complementing clone).

**pJB4632** (*dotM/dotL/dotN* complementing clone) was constructed by PCR using primers JVP274/JVP1741, followed by subcloning the BglIII/SphI-digested fragment into BglIII/SphI-digested pJB3692, thus generating pJB4624. This was followed by subcloning the *dotN* ORF from pJB3692 on a SphI fragment into SphI-digested pJB4624.

**pJB4636** (*icmS/icmW/dotM/dotL/dotN* complementing clone) was constructed by subcloning a KpnI/KpnI fragment from pJB4610 containing *icmS/icmW* into KpnI-digested pJB4632 (*dotM/dotL/dotN* complementing clone).

**pJB4680** ( $\Delta clpA$  suicide vector) was constructed by amplifying 500 bp upstream and 500 bp downstream of the *clpA* ORF using primers JVP1791/JVP1792 and JVP1793/JVP1794. The PCR products were digested with Sall/BamHI and BamHI/NotI, respectively, and cloned into Sall/NotI-digested pSR47S.

**pJB4712** (T25:DotL(3-73stop)) was constructed by amplifying a portion of *dotL* using JVP1575/JVP1704, digesting the PCR product with BamHI/PstI and cloning it into BamHI/PstI-digested pJB3322 (T25:X Ladant vector).

**pJB4722** (DotM(1-220):T18 fusion) was constructed by subcloning a KpnI/BamHI fragment containing a portion of *dotM* from pJB3767 into KpnI/BamHI-digested pJB3656 (X:T18 Ladant fusion vector).

**pJB4833** ( $\Delta clpA::Cm^R$  marked suicide vector) was constructed by subcloning a BamHI/BamHI fragment containing a chloramphenicol resistance cassette from pKRP10 into BamHI-digested pJB4680 ( $\Delta clpA$  suicide vector).

**pJB4897** (*clpA* complementing clone) was constructed by amplifying *clpA* using JVP1877/JVP1878, digesting the PCR product with SacI/KpnI and cloning it into SacI/KpnI-digested pJB908.

### **Generation of *L. pneumophila* mutants:**

JV5775 (Lp02  $\Delta ldsB$ ) was constructed by transforming Lp02 with pJB4570 (Lp02  $\Delta ldsB$ ), selecting for integrants on CYE plates supplemented with thymidine (100  $\mu\text{g/ml}$ ) and kanamycin (30  $\mu\text{g/ml}$ ), following by resolution of the merodiploid by growth on CYE plates supplemented with thymidine and sucrose (5%). Deletions were identified by PCR. JV5972 ( $\Delta ldsB \Delta dotN$ ), JV5976 ( $\Delta ldsB \Delta dotL$ ), and JV6019 ( $\Delta ldsB \Delta dotL$ ) were constructed in a similar manner by integration and resolution of pJB3046 ( $\Delta dotN$  suicide plasmid), pJB1001 ( $\Delta dotL$  suicide plasmid), pJB4429 ( $\Delta dotM$  suicide plasmid), respectively, into JV5775 (Lp02  $\Delta ldsB$ ).

The  $\Delta clpA::Cm^R$  insertion mutants ((JV6315 (Lp02  $\Delta clpA::Cm^R$ ) and JV6339 (Lp02  $\Delta icmS \Delta clpA::Cm^R$ )) were constructed by natural transformation of Lp02 or JV1962 ( $\Delta icmS$ ), respectively, using pJB4833 ( $\Delta clpA::Cm^R$  marked suicide plasmid). Natural transformation was done as previously described (Sexton & Vogel, 2004). Transformants were selected on CYET + Cm plates.

**Alkaline phosphatase assays.** Plasmids pJB3771 (DotM(1-87):PhoA), pJB3765 (DotM(1-127):PhoA), and pJB3769 (DotM(1-376):PhoA) were generated by amplifying *dotM* with primers JVP1462/JVP1432, JVP1427/JVP1432, and JVP1431/JVP1432, respectively, and cloning the PRC product into pJB3270. *L. pneumophila* strains containing PhoA fusion proteins were grown to stationary phase in AYE medium and induced in exponential phase for two hours at 37° C with IPTG (100 μM) to induce expression of the fusion proteins. Alkaline phosphatase activity was measured as previously described (Roy & Isberg, 1997, Vincent et al., 2006).

**Ladant bacterial two-hybrid screen.** Plasmid pJB4712 (T25:DotL(3-73)) was generated by amplifying *dotL* with primers JVP1575/JVP1704 and cloning the PCR product into pT25 (Karimova et al., 1998). Plasmids pJB3671 (DotM(1-127):T18), pJB4722 (DotM(1-220):T18), and pJB3672 (DotM(1-376):T18) were generated by amplifying *dotM* with primers JVP1427/JVP1432, JVP1429/JVP1432, and JVP1431/JVP1432, respectively, and cloning the PRC product into pT18 (Karimova et al., 1998). Interactions were assayed by plating transformants of the *E. coli cyaA* mutant BTH101 on MacConkey maltose (1%) plates at room temperature (Karimova et al., 1998). β-galactosidase production was assayed as previously described (Vincent & Vogel, 2006).

**Intracellular targeting assays.** Bacteria were grown in AYE to early stationary phase, washed with sterile water, diluted in RPMI and added to mouse bone marrow-derived macrophages. Infections were allowed to proceed for 1 hour at 37° C in 5% CO<sub>2</sub> prior to fixation with paraformaldehyde-lysine-periodate (PLP) containing 5% sucrose. Extracellular bacteria were stained with rabbit anti-*Legionella* IB1 (diluted 1:10,000 in PBS containing 10% goat serum) (Swanson & Isberg, 1995), then stained with goat anti-rabbit secondary antibody

conjugated to Cascade Blue (Molecular Probes) (diluted 1:10,000). The macrophages were then permeabilized with methanol and intracellular bacteria were stained with IB1 and goat anti-rabbit secondary antibody conjugated to Alexa Fluor 594 (Molecular Probes) (diluted 1:10,000). LAMP-1 was stained using the rat monoclonal antibody ID4B (diluted 1:2.5) and goat anti-rat secondary antibody conjugated to Alexa Fluor 488 (Molecular Probes) (diluted 1:100). The ID4B monoclonal antibody developed by J. Thomas August was obtained from the Developmental Studies Hybridoma Bank developed under the auspices of the NICHD and maintained by the University of Iowa, Department of Biological Sciences, Iowa City, IA 52242. Co-localization of intracellular bacteria with LAMP-1 was assessed by immunofluorescence microscopy. For each strain four sets of 100 intracellular bacteria were scored; averages and standard deviations are shown.

**Intracellular growth assays.** *L. pneumophila* strains were grown for 48 hours on CYE plates, resuspended in sterile water to a concentration of  $1 \times 10^9$  cells/ml, and diluted 1:4000 in tissue culture medium. Bacteria were then added to monolayers of U937 cells and incubated for 1 hour at 37° C. Monolayers were then washed, fresh culture medium was added, and the cells were incubated at 37° C in 5% CO<sub>2</sub>. To determine the number of colony forming units (CFU) of bacteria present, monolayers were lysed by incubation in sterile water and dilutions were plated on CYE plates. Growth assays were performed in triplicate. Fold growth was calculated by dividing the number of CFU recovered each day after infection by the number of CFU recovered immediately after infection (day 0).

## Supporting Information References

- Bardill, J.P., Miller, J.L., and Vogel, J.P. (2005) IcmS-dependent translocation of SdeA into macrophages by the *Legionella pneumophila* type IV secretion system. *Mol Microbiol* **56**: 90-103.
- Berger, K.H. and Isberg, R.R. (1993) Two distinct defects in intracellular growth complemented by a single genetic locus in *Legionella pneumophila*. *Mol Microbiol* **7**: 7-19.
- Buscher, B.A., Conover, G.M., Miller, J.L., Vogel, S.A., Meyers, S.N., Isberg R.R., and Vogel, J.P. (2005) The DotL protein, a member of the TraG-coupling protein family, is essential for viability of *Legionella pneumophila* strain Lp02. *J Bacteriol* **187**: 2927-2938.
- Karimova, G., Pidoux, J., Ullmann, A., and Ladant, D. (1998) A bacterial two-hybrid system based on a reconstituted signal transduction pathway. *Proc Natl Acad Sci U S A* **95**: 5752-5756.
- Merriam, J.J., Mathur, R., Maxfield-Boumil, R., and Isberg, R.R. (1997) Analysis of the *Legionella pneumophila* *fliI* gene: intracellular growth of a defined mutant defective for flagellum biosynthesis. *Infect Immun* **65**: 2497-2501.
- Reece, K.S. and Phillips, G.J. (1995) New plasmids carrying antibiotic-resistance cassettes. *Gene* **165**: 141-142.
- Roy, C.R. and Isberg, R.R. (1997) Topology of *Legionella pneumophila* DotA: an inner membrane protein required for replication in macrophages. *Infect Immun* **65**: 571-578.
- Sexton, J.A., Pinkner, J.S., Roth, R., Heuser, J.E., Hultgren, S.J., and Vogel, J.P. (2004) The *Legionella pneumophila* PilT homologue DotB exhibits ATPase activity that is critical for intracellular growth. *J Bacteriol* **186**: 1658-1666.
- Sexton, J.A. and Vogel, J.P. (2004) Regulation of hypercompetence in *Legionella pneumophila*. *J Bacteriol* **186**: 3814-3825.
- Swanson, M.S. and Isberg, R.R. (1995) Association of *Legionella pneumophila* with the macrophage endoplasmic reticulum. *Infect Immun* **63**: 3609-3620.
- Tobe, T., Ito, K., and Yura, T. (1984) Isolation and physical mapping of temperature-sensitive mutants defective in heat-shock induction of proteins in *Escherichia coli*. *Mol Gen Genet* **195**: 10-16.
- Vincent, C.D., Friedman, J.R., Jeong, K.C., Buford, E.C., Miller, J.L., and Vogel, J.P. (2006) Identification of the core transmembrane complex of the *Legionella* Dot/Icm type IV secretion system. *Mol Microbiol*.
- Vincent, C.D. and Vogel, J.P. (2006) The *Legionella pneumophila* IcmS-LvgA protein complex is important for Dot/Icm-dependent intracellular growth. *Mol Microbiol* **61**: 596-613.
